# Supplementary material for: Gasoline direct injection vehicles exceed port fuel injection ones in both primary aerosol emission and secondary aerosol formation
Source: Copernicus journal article supplement (doi:10.5194/acp-2017-776), 2017-10-16
Supplement: Supplementary file 1 [file acp-2017-776-supplement.pdf]

1 **Supplementary information**

2 **Gasoline direct injection vehicles exceed port fuel injection ones in both primary aerosol**  
3 **emission and secondary aerosol formation**

4 Zhuofei Du<sup>1</sup>, Min Hu<sup>1,3\*</sup>, Jianfei Peng<sup>1†</sup>, Wenbin Zhang<sup>2</sup>, Jing Zheng<sup>1</sup>, Fangting Gu<sup>1</sup>, Yanhong  
5 Qin<sup>1</sup>, Yudong Yang<sup>1</sup>, Mengren Li<sup>1</sup>, Yusheng Wu<sup>1</sup>, Min Shao<sup>1</sup>, Shijin Shuai<sup>2</sup>

6 1. State Key Joint Laboratory of Environmental Simulation and Pollution Control, College of  
7 Environmental Sciences and Engineering, Peking University, Beijing 100871, China

8 2. State Key Laboratory of Automotive Safety and Energy, Department of Automotive  
9 Engineering, Tsinghua University, Beijing 100084, China

10 3. Beijing Innovation Center for Engineering Sciences and Advanced Technology, Peking  
11 University, Beijing 100871, China

12 † Now at Department of Atmospheric Sciences, Texas A&M University, College Station, TX  
13 77843, US

14

15 \*Corresponding author: Min Hu, minhu@pku.edu.cn

16

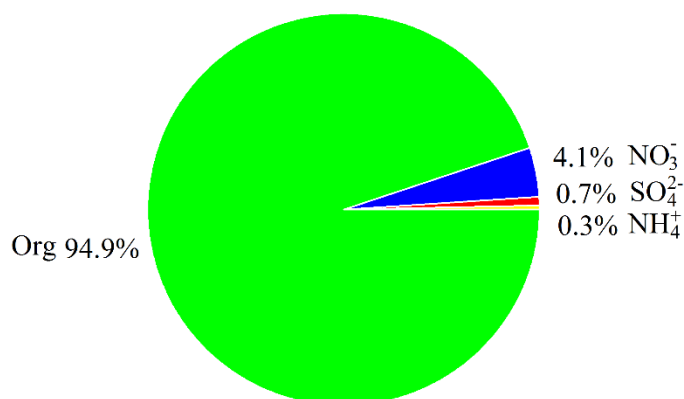

17

18 Figure S1. Chemical composition of secondary aerosol formed in the chamber experiment  
19 (Experiment GDI-1).
